# Supplementary material for: Comprehensive proteome profiling of glioblastoma-derived extracellular vesicles identifies markers for more aggressive disease
Source: J Neurooncol. 2016 Oct 21;131(2):233–44. doi: 10.1007/s11060-016-2298-3 (PMC5306193; doi:10.1007/s11060-016-2298-3)
Supplement: Supplementary file 3 — Supplementary material 3 (XLSX 59 KB) [file 11060_2016_2298_MOESM3_ESM.xlsx]

## Sheet: Sheet1
				Averaged precusor ion intensity
Accession Number	Protein Name	Gene Name	MW (kDa)	A172	CCF	LN	T98	U251	U87
A2MG_HUMAN	Alpha-2-macroglobulin	A2M	163	3948900	2813700	268347	743367	221917	1.88005e+06
ACLY_HUMAN	ATP-citrate synthase	ACLY	121	55555.3	20067	43236.3	105122	37725	105613
ACTN1_HUMAN	Alpha-actinin-1	ACTN1	103	40555.3	62988.3	59434.3	50916	69207.3	32720.3
ACTN4_HUMAN	Alpha-actinin-4	ACTN4	105	198963	111835	103108	134600	123389	139317
AGRIN_HUMAN	Agrin	AGRN	217	430460	90155	60785.7	42831	74684.7	69339.3
SAHH_HUMAN	Adenosylhomocysteinase	AHCY	48	64109.3	57173.3	150300	101310	72523.7	121712
FETUA_HUMAN	Alpha-2-HS-glycoprotein	AHSG	39	4.23457e+06	5293000	420593	4734000	4.25118e+06	8.12793e+06
ALBU_HUMAN	Serum albumin	ALB	69	2.53443e+07	9.87073e+06	1.20298e+07	1.60199e+07	7.27803e+06	3.67023e+06
ALDOA_HUMAN	Fructose-bisphosphate aldolase A	ALDOA	39	274933	249113	270083	331287	142297	430357
ANXA1_HUMAN	Annexin A1	ANXA1	39	70690.5	70844.5	49624.3	53190	81978.3	204147
A4_HUMAN	Amyloid beta A4 protein	APP	87	70333.3	12561	54610	65410.3	41136	137556
ATRN_HUMAN	Attractin	ATRN	159	49825	36122	78159.3	50474.3	21784	33821.7
CO3_HUMAN	Complement C3	C3	187	128370	208115	346380	194937	463275	371677
PYR1_HUMAN	CAD protein	CAD	243	68444	7436.1	46637.7	41489	22764	63712
CALR_HUMAN	Calreticulin	CALR	48	49436.3	51472	31832	17209.6	23288	97760.5
CAND1_HUMAN	Cullin-associated NEDD8-dissociated protein 1	CAND1	136	39407.3	32647	67482.3	39190	14470.7	59364.3
TCPB_HUMAN	T-complex protein 1 subunit beta	CCT2	57	47554	34449	61708.3	46853.7	46072.5	71585
TCPG_HUMAN	T-complex protein 1 subunit gamma	CCT3	61	86007	21515	106510	65473	58033.7	117634
TCPD_HUMAN	T-complex protein 1 subunit delta	CCT4	58	51469.3	19208	47886.3	54943.3	77761.5	55497
CD109_HUMAN	CD109 antigen	CD109	162	58931.5	88590.7	228073	9726	60596.7	64118.3
CSTN1_HUMAN	Calsyntenin-1	CLSTN1	110	75479.3	37850	101798	15387.7	58028	70380
CLH1_HUMAN	Clathrin heavy chain 1	CLTC	192	55715.7	53994.3	116712	85567	96573	75639.3
CLUS_HUMAN	Clusterin	CLU	52	401087	374383	259007	913207	271660	600280
COCA1_HUMAN	Collagen alpha-1(XII) chain	COL12A1	333	26186.3	203143	81926	62066	90336	25788.3
CO6A1_HUMAN	Collagen alpha-1(VI) chain	COL6A1	109	250020	322213	145194	541577	274023	222357
CO6A2_HUMAN	Collagen alpha-2(VI) chain	COL6A2	109	57190.3	222660	85666	289090	63344.5	286660
PPGB_HUMAN	Lysosomal protective protein	CTSA	54	39527.5	33678	113020	31034.3	35035	52493
CATD_HUMAN	Cathepsin D	CTSD	45	145857	51976	48444.7	99575.3	42257.3	216877
DYHC1_HUMAN	Cytoplasmic dynein 1 heavy chain 1	DYNC1H1	532	25824	11369	45301.3	30397	15000	35859
EDIL3_HUMAN	EGF-like repeat and discoidin I-like domain-containing protein 3	EDIL3	54	84751.5	255530	91787	52812	161576	176346
EF1A3_HUMAN	Putative elongation factor 1-alpha-like 3	EEF1A1P5	50	131390	80200.3	367893	205723	274505	212947
EF1G_HUMAN	Elongation factor 1-gamma	EEF1G	50	56485.3	37654	139347	190822	62061.5	112671
EF2_HUMAN	Elongation factor 2	EEF2	95	104557	60708	97564	131568	144240	211453
EIF3C_HUMAN	Eukaryotic translation initiation factor 3 subunit C	EIF3C	105	26990	20479	16268.2	55530	25167.7	31427
EIF3L_HUMAN	Eukaryotic translation initiation factor 3 subunit L	EIF3L	67	16449.6	32656	18526	42369.7	69659	56919
ENOA_HUMAN	Alpha-enolase	ENO1	47	26610.3	58748	322080	221007	79056.7	126981
SYEP_HUMAN	Bifunctional glutamate/proline--tRNA ligase	EPRS	171	25595.5	4348.55	31890.7	36117.7	12605	22306.3
THRB_HUMAN	Prothrombin	F2	70	480820	47719	98194	126750	55655	84430.5
FAS_HUMAN	Fatty acid synthase	FASN	273	142650	22063.3	92330	108825	76925.7	71272.7
FLNA_HUMAN	Filamin-A	FLNA	281	223023	81641	193733	166830	88414.3	79294
FLNB_HUMAN	Filamin-B	FLNB	278	58654.7	5119.8	36313.7	35425	10468	32984
FINC_HUMAN	Fibronectin	FN1	263	75157	674207	726503	525773	365063	1.19387e+06
GANAB_HUMAN	Neutral alpha-glucosidase AB	GANAB	107	39761	34682.7	29464	66003	9774.95	42147.7
G3P_HUMAN	Glyceraldehyde-3-phosphate dehydrogenase	GAPDH	36	593235	464850	210060	258650	512155	1.61859e+06
VTDB_HUMAN	Vitamin D-binding protein	GC	53	553740	704015	136290	473970	702493	658825
GGH_HUMAN	Gamma-glutamyl hydrolase	GGH	36	92190	75160	160179	41886.7	83699	127635
GSLG1_HUMAN	Golgi apparatus protein 1	GLG1	135	7625	8571.3	12033.2	38306	10061.8	6459.6
G6PI_HUMAN	Glucose-6-phosphate isomerase	GPI	63	130222	68333.7	69600.3	348127	111993	182000
GELS_HUMAN	Gelsolin	GSN	86	111280	57019.5	127101	65439	51861	129730
SYHC_HUMAN	Histidine--tRNA ligase, cytoplasmic	HARS	57	48722.5	15490.7	41807.7	22179	23574	25324.7
HBA_HUMAN	Hemoglobin subunit alpha	HBA1	15	277960	61864.7	79360	55528.5	233375	191157
HEXA_HUMAN	Beta-hexosaminidase subunit alpha	HEXA	61	120297	52127	85896.5	84861	48703	68344.7
HEXB_HUMAN	Beta-hexosaminidase subunit beta	HEXB	63	103661	32637	66313.3	82695	38513	76699.3
H4_HUMAN	Histone H4	HIST1H4A	11	556235	442293	418537	235600	395570	163300
HNRPC_HUMAN	Heterogeneous nuclear ribonucleoproteins C1/C2	HNRNPC	34	23073	9946.05	46036.3	27622.5	23672.5	25126.3
HS90A_HUMAN	Heat shock protein HSP 90-alpha	HSP90AA1	85	90383.7	245787	304511	154867	211067	269583
HS90B_HUMAN	Heat shock protein HSP 90-beta	HSP90AB1	83	94975.7	14983	515340	244878	144083	173427
HSP74_HUMAN	Heat shock 70 kDa protein 4	HSPA4	94	33475	28044	124407	51081	85211	68392.3
GRP78_HUMAN	78 kDa glucose-regulated protein	HSPA5	72	118564	97718.3	157467	297797	118319	124330
HSP7C_HUMAN	Heat shock cognate 71 kDa protein	HSPA8	71	70037.7	67416	157742	54210.7	68760	57843
IQGA1_HUMAN	Ras GTPase-activating-like protein IQGAP1	IQGAP1	189	34374	16067.2	60540	27884	33002.7	28512.3
ITIH2_HUMAN	Inter-alpha-trypsin inhibitor heavy chain H2	ITIH2	106	765910	499647	979983	351857	757730	540107
IMB1_HUMAN	Importin subunit beta-1	KPNB1	97	27631.5	30653.3	62406.5	96892.7	70452	142086
K2C1_HUMAN	Keratin, type II cytoskeletal 1	KRT1	66	77756	51737.7	86115.7	39197.3	128180	21924.3
K1C10_HUMAN	Keratin, type I cytoskeletal 10	KRT10	59	62635.7	33880.7	66672	23371	82744.7	24409.3
K1C9_HUMAN	Keratin, type I cytoskeletal 9	KRT9	62	33245.3	20644	31882	9969	89379	7624.25
LAMA4_HUMAN	Laminin subunit alpha-4	LAMA4	203	133677	176007	150307	83631	100599	50477
LAMB1_HUMAN	Laminin subunit beta-1	LAMB1	198	341890	225147	262217	167480	151457	124625
LAMC1_HUMAN	Laminin subunit gamma-1	LAMC1	178	359967	222797	196307	132647	188663	102725
LDHB_HUMAN	L-lactate dehydrogenase B chain	LDHB	37	195660	69906.3	198690	167890	266840	216773
LG3BP_HUMAN	Galectin-3-binding protein	LGALS3BP	65	2.56397e+06	803583	1.11745e+06	2.97553e+06	1.06355e+06	1.37503e+06
LMNA_HUMAN	Prelamin-A/C	LMNA	74	76742.3	16409.7	93342.7	71160	18524.3	47109.7
LOXL2_HUMAN	Lysyl oxidase homolog 2	LOXL2	87	94148.7	76677.7	66534.3	78187.3	111711	43924
LTBP3_HUMAN	Latent-transforming growth factor beta-binding protein 3	LTBP3	139	23095.3	22111.5	43628	13081	31409.7	19960.3
MMP2_HUMAN	72 kDa type IV collagenase	MMP2	74	317973	344867	236940	217253	139594	455120
MOES_HUMAN	Moesin	MSN	68	66049.7	11088.9	30567.3	36461.7	33510	26776
MYH9_HUMAN	Myosin-9	MYH9	227	25139.7	16634	40927	54854.7	42464.7	36762.3
NUCL_HUMAN	Nucleolin	NCL	77	33479.5	7339.7	77542	72222.3	41949.3	51824.7
PSA_HUMAN	Puromycin-sensitive aminopeptidase	NPEPPS	103	24542.3	23605.7	62171.3	42744	25100.3	37955.7
NPM_HUMAN	Nucleophosmin	NPM1	33	72909.7	39441	33673	171111	410990	67610.7
P3H1_HUMAN	Prolyl 3-hydroxylase 1	P3H1	83	24045.7	17446	41909.7	35496.7	20129	29009.7
PDIA1_HUMAN	Protein disulfide-isomerase	P4HB	57	45520	54270.3	66913	87374	38093.5	119183
PUR6_HUMAN	Multifunctional protein ADE2	PAICS	47	21381.5	31999.3	80852	30183	94566.3	40107.3
PDC6I_HUMAN	Programmed cell death 6-interacting protein	PDCD6IP	96	74686	34789	41846.7	47734.5	36826.5	91482
PGK1_HUMAN	Phosphoglycerate kinase 1	PGK1	45	31032.7	84470.3	181187	85257.5	82483.5	150608
KPYM_HUMAN	Pyruvate kinase isozymes M1/M2	PKM	58	308710	149957	237073	350630	155039	293340
PLEC_HUMAN	Plectin	PLEC	532	18491.7	11848	48148.3	39303.7	12126.6	17162.3
PLOD1_HUMAN	Procollagen-lysine,2-oxoglutarate 5-dioxygenase 1	PLOD1	84	41688	164627	171093	207260	181557	191857
PLOD2_HUMAN	Procollagen-lysine,2-oxoglutarate 5-dioxygenase 2	PLOD2	85	25783	67843.7	95305	148211	48763.5	60502.7
PLOD3_HUMAN	Procollagen-lysine,2-oxoglutarate 5-dioxygenase 3	PLOD3	85	17249	137170	272297	99635.3	94372	55406.5
PPIA_HUMAN	Peptidyl-prolyl cis-trans isomerase A	PPIA	18	61833.7	57605.5	138076	260377	68025.5	110270
ANM1_HUMAN	Protein arginine N-methyltransferase 1	PRMT1	42	11728	12968	29482	55025.5	83811.7	19564
SAP_HUMAN	Proactivator polypeptide	PSAP	58	165814	26091.5	63206	85298.7	158320	194823
PSA1_HUMAN	Proteasome subunit alpha type-1	PSMA1	30	91625.3	69904.7	132299	112517	80705.3	95698.7
PSA3_HUMAN	Proteasome subunit alpha type-3	PSMA3	28	58259	45813.3	57701.7	70894	42120	95743
PSA4_HUMAN	Proteasome subunit alpha type-4	PSMA4	29	39212.7	52588.5	206893	71382.3	8357.65	44448.7
PSA5_HUMAN	Proteasome subunit alpha type-5	PSMA5	26	176630	69099.5	65945	223500	208910	102596
PSA6_HUMAN	Proteasome subunit alpha type-6	PSMA6	27	148752	99964	331407	174449	143527	210597
PSA7_HUMAN	Proteasome subunit alpha type-7	PSMA7	28	166257	263303	131490	291970	73308.3	172393
PSB1_HUMAN	Proteasome subunit beta type-1	PSMB1	26	122772	204835	255633	156627	380965	262547
PSB2_HUMAN	Proteasome subunit beta type-2	PSMB2	23	99004.7	91651.7	228170	220220	153643	223025
PSB3_HUMAN	Proteasome subunit beta type-3	PSMB3	23	98872	72195.7	102302	49288.7	90730.7	104264
PSB4_HUMAN	Proteasome subunit beta type-4	PSMB4	29	113701	229180	166390	102680	44144	22999.8
PSB5_HUMAN	Proteasome subunit beta type-5	PSMB5	28	128456	43206	136487	36658.3	111919	109922
PRS7_HUMAN	26S protease regulatory subunit 7	PSMC2	49	36175.3	9200.27	31609.3	25698.7	33135	38576.7
PSD11_HUMAN	26S proteasome non-ATPase regulatory subunit 11	PSMD11	47	54865	14224	51918.7	41385.3	31591.3	60422.7
PSD13_HUMAN	26S proteasome non-ATPase regulatory subunit 13	PSMD13	43	42189.7	9450.1	31767	47298.3	17841	37831.3
PSMD2_HUMAN	26S proteasome non-ATPase regulatory subunit 2	PSMD2	100	44622.7	16014.3	31513.3	52376	57638	108339
PSMD3_HUMAN	26S proteasome non-ATPase regulatory subunit 3	PSMD3	61	41814.7	20940	26575.3	53862.7	64572.5	54782
PSMD6_HUMAN	26S proteasome non-ATPase regulatory subunit 6	PSMD6	46	29664	20590	52914.3	64592.7	10555	58287
PYGB_HUMAN	Glycogen phosphorylase, brain form	PYGB	97	42104.5	29546	66946.3	42486	50331.5	29833.5
QSOX1_HUMAN	Sulfhydryl oxidase 1	QSOX1	83	168840	150116	64151.7	104317	183471	130897
RL12_HUMAN	60S ribosomal protein L12	RPL12	18	83047.7	49779.5	238898	120001	224588	122183
RLA2_HUMAN	60S acidic ribosomal protein P2	RPLP2	12	285290	118663	419523	310565	228480	327815
RS18_HUMAN	40S ribosomal protein S18	RPS18	18	30972	7998.5	49770	51836.7	29988.3	30039
RS27A_HUMAN	Ubiquitin-40S ribosomal protein S27a	RPS27A	18	120027	338665	230457	312603	492830	416523
RS9_HUMAN	40S ribosomal protein S9	RPS9	23	86953	21195	72330	110887	37888	51646
RUVB1_HUMAN	RuvB-like 1	RUVBL1	50	54770.3	42995	96401.7	127660	60038.7	111799
SEPT2_HUMAN	Septin-2	SEPT2	41	57988.3	93342.5	39534.5	87792.7	53837	64686.5
ANT3_HUMAN	Antithrombin-III	SERPINC1	53	206340	168240	161890	257700	328020	221585
GDN_HUMAN	Glia-derived nexin	SERPINE2	44	225080	58330.5	211400	54784.3	68126.7	73244.3
SF3B3_HUMAN	Splicing factor 3B subunit 3	SF3B3	136	27279.7	24576.5	65324.3	60451.7	46659	37472
4F2_HUMAN	4F2 cell-surface antigen heavy chain	SLC3A2	68	46684.5	27443	111560	43907	98084	57836.5
SPRC_HUMAN	Secreted protein, acidic, cysteine-rich (Osteonectin)	SPARC	35	341470	554693	493550	388157	147673	62553
SYTC_HUMAN	Threonine--tRNA ligase, cytoplasmic	TARS	83	27214	17593	56733.3	44230	46279	17412.3
TCPA_HUMAN	T-complex protein 1 subunit alpha	TCP1	60	29355.7	31701	36445	47923.7	31748.5	60726
TGFB1_HUMAN	Transforming growth factor beta-1	TGFB1	44	84852	31278.3	42130	15024	56648	45398
TSP1_HUMAN	Thrombospondin-1	THBS1	129	98977.3	152770	439623	53978.7	166737	33693.3
TKT_HUMAN	Transketolase	TKT	68	147370	86150.3	180370	341387	237077	129843
TLN1_HUMAN	Talin-1	TLN1	270	17625	25423.7	43805	23165	27872	24323.7
TPIS_HUMAN	Triosephosphate isomerase	TPI1	31	71098	157219	132044	304117	48634	210883
UBA1_HUMAN	Ubiquitin-like modifier-activating enzyme 1	UBA1	118	57809.3	35268.3	146680	151967	59463	50560.3
UGPA_HUMAN	UTP--glucose-1-phosphate uridylyltransferase	UGP2	57	63465.7	41565.5	95752.3	52823	81630	39713
CSPG2_HUMAN	Versican core protein	VCAN	373	127819	427833	327207	25174	315450	153443
VINC_HUMAN	Vinculin	VCL	124	43234.7	31820.3	70509.3	45239.7	53363.7	57234
TERA_HUMAN	Transitional endoplasmic reticulum ATPase	VCP	89	77810	51387.3	87008	76915.3	165263	71197.3
VIME_HUMAN	Vimentin	VIM	54	104507	310593	254037	205600	236317	371377
VPS35_HUMAN	Vacuolar protein sorting-associated protein 35	VPS35	92	15621.4	10915.4	33933	45401.7	4864.7	20770.5
XPO1_HUMAN	Exportin-1	XPO1	123	21158	29865	50231.7	37871	11795	54778
XRCC5_HUMAN	X-ray repair cross-complementing protein 5	XRCC5	83	9043.67	27090.7	42018	71943.7	22149.5	34487.3
1433B_HUMAN	14-3-3 protein beta/alpha	YWHAB	28	30549	22995	72375.7	118430	22296	104169
1433E_HUMAN	14-3-3 protein epsilon	YWHAE	29	36644.7	47783.3	48355	82167.3	73547.3	44470
1433G_HUMAN	14-3-3 protein gamma	YWHAG	28	62085	40777	10528.3	43616	44817	25958
1433T_HUMAN	14-3-3 protein theta	YWHAQ	28	31285	57833.3	42865	66153.3	54399.5	115633
1433Z_HUMAN	14-3-3 protein zeta/delta	YWHAZ	28	231515	156917	332467	256917	235153	230083
